# Supplementary material for: Seed priming with essential oils for sustainable wheat agriculture in semi-arid region
Source: PeerJ. 2023 Mar 27;11:e15126. doi: 10.7717/peerj.15126 (PMC10062347; doi:10.7717/peerj.15126)
Supplement: Supplemental Information 3 [file peerj-11-15126-s003.xlsx]

## Sheet: Sayfa1
	Daily Total Rain (mm=kg÷m²)
	Day/month	2019 Oct	2019 Nov	2019 Dec	2020 Jan	2020 Feb	2020 Mar	2020 Apr	2020 May	2020 Jun	2020 July	2020 Aug	2020 Sep
	1			2.9	0.8	0.5	0.0		0.6	3.6
	2			3.8	0.0	0.2		0.0		0.0
	3		1.1	5.5				15.4	7.4
	4	5.1	1.9	14.9		4.0			2.8	0.0
	5	6.2	2.1			0.2		0.0
	6	7.5	2.4	0.5	0.0	9.6	1.8	0.0	0.4
	7		1.4	0.4	2.8	8.0
	8		1.3	0	2.6	0.0			0.8		1.4
	9		1.1	0	0.4	0.0
	10	2.1	0.6	13.4		0.0	0.6
	11	4.5	0.9	5.6			0.0			1.2		0.0
	12		1.2	7.2		4.0				5.8
	13		0.7	4.9		2.2				0.0	0.4		0.0
	14		1.4	0						2.4
	15		1.6	0				0.0		0.4
	16		0.8	19.1			2.2	4.4		8.0
	17		1	18.4			0.0			0.0	0.0
	18		0.8	5.8						14.0
	19			6	0.0		5.4			0.0			0.0
	20		1.3		0.0		1.6			2.8
	21		1.2		0.4	0.8				1.4
	22		1.6			7.0		0.8	0.0	0.2
	23		0.4			0.8		0.0	0.4	2.0
	24		0.6		0.0		0.0		0.0	0.0
	25	0.5	0.7				0.4						3.8
	26	1.1	2										0.2
	27	1.8	1.8						2.2	0.0
	28	1.6	1.2		0.0	3.4	2.0
	29		1		3.8	8.0	3.8		19.8
	30	2.2	3.1		0.4				1.8				0.8
	31		2.8	1.1	3.6
	Mean	32.2	38	109.5	14.8	48.7	17.8	20.6	36.2	41.8	1.8	0	4.8
	Daily Avarage Temperature (°C)
	Day/month	2019 Oct	2019 Nov	2019 Dec	2020 Jan	2020 Feb	2020 Mar	2020 Apr	2020 May	2020 Jun	2020 July	2020 Aug	2020 Sep
	1	15.1	15.1	0.5	3.0	1.1	3.9	8.1	12.9	14.4	22.7	25.9	25.9
	2	14.6	14.6	5.4	0.8	4.9	4.4	7.9	11.3	14.6	23.5	23.3	25.8
	3	14.4	12.1	3.6	0.4	5.8	6.7	5.8	8.6	14.1	24.5	20.9	26.9
	4	15.4	15.4	4.1	-1.1	7.0	8.0	6.2	12.2	15.8	25.2	22.7	25.7
	5	16.4	16.4	3.2	0.1	8.5	7.6	9.9	10.7	16.1	24.8	24.0	22.4
	6	18.8	14.4	2.2	-0.8	4.5	9.1	9.6	12.3	19.4	25.7	25.3	19.8
	7	19.4	13.2	0.8	2.6	0.5	6.5	6.8	11.5	22.3	25.7	26.4	21.3
	8	22.4	18.2	4.6	2.8	-4.4	9.4	8.5	8.9	22.4	23.5	26.9	22.7
	9	18.9	13.2	1.1	-0.3	-6.6	11.7	8.7	10.1	23.3	21.6	25.7	22.3
	10	16.6	12.2	3.0	-3.5	-4.0	11.3	9.2	12.0	21.3	21.1	23.2	20.8
	11	15.1	13.2	2.8	-2.8	-4.4	9.0	8.7	14.5	19.3	21.8	23.1	22.1
	12	16.4	13.4	3.4	0.1	1.4	9.6	8.3	17.7	16.6	23.9	23.5	24.1
	13	17.0	12.2	8.5	0.8	1.9	12.0	8.7	19.8	14.2	23.0	23.4	22.3
	14	16.5	10.3	7.2	-1.3	-1.3	14.4	9.8	19.8	15.3	21.8	21.5	22.4
	15	16.3	11.3	7.3	-0.7	2.4	9.4	9.8	21.3	16.4	24.0	20.0	22.4
	16	15.2	12.3	8.4	-0.8	3.6	3.4	9.5	22.8	18.5	24.0	20.7	21.6
	17	14.8	10.9	4.8	-0.5	3.0	-1.0	9.5	20.5	19.4	22.4	20.5	21.7
	18	15.3	14.3	3.3	-1.6	1.2	-2.1	12.6	21.9	18.1	23.9	21.5	21.4
	19	15.0	13.6	4.4	-0.9	1.7	-0.3	13.0	21.3	16.5	27.1	23.2	20.4
	20	13.1	13.1	0.8	-2.8	3.3	1.9	14.1	22.1	16.5	27.5	23.2	19.6
	21	13.2	13.2	-0.9	-0.9	3.4	5.1	11.5	23.6	17.4	22.3	20.7	17.2
	22	14.5	13.8	1.4	-3.5	2.3	5.8	8.2	15.2	19.9	22.0	21.1	18.4
	23	14.8	14.1	-1.5	-2.6	1.9	8.9	6.4	7.3	20.4	22.0	20.8	19.6
	24	14.8	14.3	-3.1	-2.8	5.3	10.7	6.6	9.6	19.4	22.3	22.6	19.2
	25	14.4	14.4	2.7	-3.5	4.5	9.4	8.9	11.7	19.6	23.6	22.8	17.3
	26	14.5	14.5	2.8	-2.3	3.7	9.8	10.1	14.6	21.6	25.6	24.0	17.2
	27	14.1	14.1	3.2	-1.1	5.9	9.6	12.1	15.6	20.3	26.4	23.7	19.5
	28	14.6	12.2	2.4	0.3	6.7	9.9	11.4	14.5	22.3	24.8	23.7	19.9
	29	12.7	10.8	4.8	3.8	5.8	6.3	11.4	10.5	22.7	23.3	24.9	20.3
	30	11.5	10.3	4.4	4.8		6.4	13.1	11.8	22.3	24.2	24.9	18.1
	31	14.5	9.3	4.9	0.7		8.9		12.8		24.8	25.6
	Mean	15.42	13.2	3.24	-0.4	2.4	7.2	9.48	14.81	18.68	23.83	23.21	21.27
		Oct	Nov	Dec	Jan	Feb	Mar	Apr	May	Jun	July	Aug	Sep
	Rain	32.2	38	109.5	14.8	48.7	17.8	20.6	36.2	41.8	1.8	0	4.8
	Temp Avg	19.2	12.1	3.1	-0.4	2.4	7.2	9.48	14.81	18.68	23.83	23.21	21.27
