# Supplementary material for: Seed priming with essential oils for sustainable wheat agriculture in semi-arid region
Source: PeerJ. 2023 Mar 27;11:e15126. doi: 10.7717/peerj.15126 (PMC10062347; doi:10.7717/peerj.15126)
Supplement: Supplemental Information 4 [file peerj-11-15126-s004.docx]

Tables created according to the statistical analysis results of Figures 2,3,4,5 and 6 are given below. In addition, the raw data entered for statistical analysis were shared in the "Raw data laboratory experiment" file.

| Germination | Rosemary | Sage | Lavander | Total |
| --- | --- | --- | --- | --- |
| D0 | 91,4000 | 91,0000 | 90,6000 | 91,0000b |
| D1 | 89,4000 | 94,0000 | 89,4000 | 90,9333b |
| D2 | 93,3000 | 94,0000 | 92,4000 | 93,2333a |
| D3 | 81,6000 | 85,4000 | 78,4000 | 81,8000c |
| D4 | 41,7000 | 40,9000 | 40,9000 | 41,1667d |
| Total | 79,4800b | 81,0600a | 78,3400c |  |

*The differences between the averages shown with different letters in the columns and rows are significant at the rate of 0.01.

*D0 (control), D1: 0.01%, D2 : 0.05%, D3 : 0.10%, D4 : 0.25%

| Coleoptile length | Rosemary | Sage | Lavander | Total |
| --- | --- | --- | --- | --- |
| D0 | 5,1500 | 5,6500 | 4,9000 | 5,2333b |
| D1 | 6,4500 | 7,1500 | 5,6000 | 6,4000a |
| D2 | 7,1000 | 6,6000 | 5,4000 | 6,3667a |
| D3 | 2,3000 | 5,0000 | 4,6000 | 3,9667c |
| D4 | 2,3000 | 2,1000 | 2,0500 | 2,1500d |
| Total | 4,6600b | 5,3000a | 4,5100b | 4,8233 |

*The differences between the averages shown with different letters in the columns and rows are significant at the rate of 0.05.

| Shoot length | Rosemary | Sage | Lavander | Total |
| --- | --- | --- | --- | --- |
| D0 | 17,0500 | 17,0500 | 16,9000 | 17,0000b |
| D1 | 18,7000 | 20,4500 | 14,5500 | 17,9000ab |
| D2 | 22,4000 | 19,2000 | 13,9500 | 18,5167a |
| D3 | 19,5000 | 14,5500 | 13,6500 | 15,9000c |
| D4 | 11,0000 | 9,4000 | 11,7000 | 10,7000d |
| Total | 17,7300a | 16,1300b | 14,1500c |  |

*The differences between the averages shown with different letters in the columns and rows are significant at the rate of 0.01.

| Root length | Rosemary | Sage | Lavander | Total |
| --- | --- | --- | --- | --- |
| D0 | 9,9500 | 9,8000 | 10,9500 | 10,2333c |
| D1 | 12,5500 | 14,0000 | 11,3500 | 12,6333b |
| D2 | 13,7000 | 15,2500 | 12,3500 | 13,7667a |
| D3 | 14,3000 | 14,1000 | 9,5500 | 12,6500b |
| D4 | 10,2000 | 11,1000 | 9,3500 | 10,2167c |
| Total | 12,1400a | 12,8500a | 10,7100c | 11,9000 |

*The differences between the averages shown with different letters in the columns and rows are significant at the rate of 0.01.

| Proline | Rosemary | Sage | Lavander | Total |
| --- | --- | --- | --- | --- |
| D0 | 2,4900 | 2,4200 | 2,1900 | 2,3667a |
| D1 | 2,4600 | 2,5100 | 2,0100 | 2,3267b |
| D2 | 2,0500 | 2,2400 | 2,2400 | 2,1767e |
| D3 | 2,0900 | 2,3900 | 2,2000 | 2,2267d |
| D4 | 2,5200 | 2,1000 | 2,0800 | 2,2333c |
| Total | 2,3220b | 2,3320a | 2,1440c | 2,2660 |

*The differences between the averages shown with different letters in the columns and rows are significant at the rate of 0.01.

| RWC | Rosemary | Sage | Lavander | Total |
| --- | --- | --- | --- | --- |
| D0 | 70,3860 | 69,3490 | 69,9220 | 69,8857c |
| D1 | 71,0480 | 70,2320 | 70,0790 | 70,4530b |
| D2 | 75,3210 | 71,9170 | 71,4830 | 72,9070a |
| D3 | 71,3720 | 67,6780 | 69,3260 | 69,4587d |
| D4 | 70,8650 | 63,9950 | 68,0140 | 67,6247e |
| Total | 71,7984a | 68,6342c | 69,7648b | 70,0658 |

*The differences between the averages shown with different letters in the columns and rows are significant at the rate of 0.01.

| Chlorophlly total | Rosemary | Sage | Lavander | Total |
| --- | --- | --- | --- | --- |
| D0 | 423,0620 | 481,2850 | 468,4350 | 457,5940b |
| D1 | 471,2370 | 407,1750 | 453,7500 | 444,0540d |
| D2 | 546,8550 | 352,4370 | 445,4790 | 448,2570c |
| D3 | 720,2530 | 359,2840 | 470,2680 | 516,6017a |
| D4 | 330,3750 | 300,4590 | 425,4120 | 352,0820e |
| Total | 498,3564a | 380,1280c | 452,6688b | 443,7177 |

*The differences between the averages shown with different letters in the columns and rows are significant at the rate of 0.01.
